# Supplementary material for: Unravelling the synergies: effects of hydrogel mechanics and biofunctionalization on mesenchymal stem cell osteogenic differentiation
Source: Royal Society of Chemistry journal article supplement (doi:10.1039/d5ma00165j), 2025-01-01
Supplement: d5ma00165j1.pdf [file d5ma00165j1.pdf]

## SUPPORTING INFORMATION

### Unravelling the Synergies: Effects of Hydrogel Mechanics and Biofunctionalization on the Osteogenic Differentiation of Mesenchymal Stem Cells

Cristina López-Serrano, Murielle Rémy, Thierry Leste-Lasserre, Gaétan Laroche\*, Marie-Christine Durrieu\*

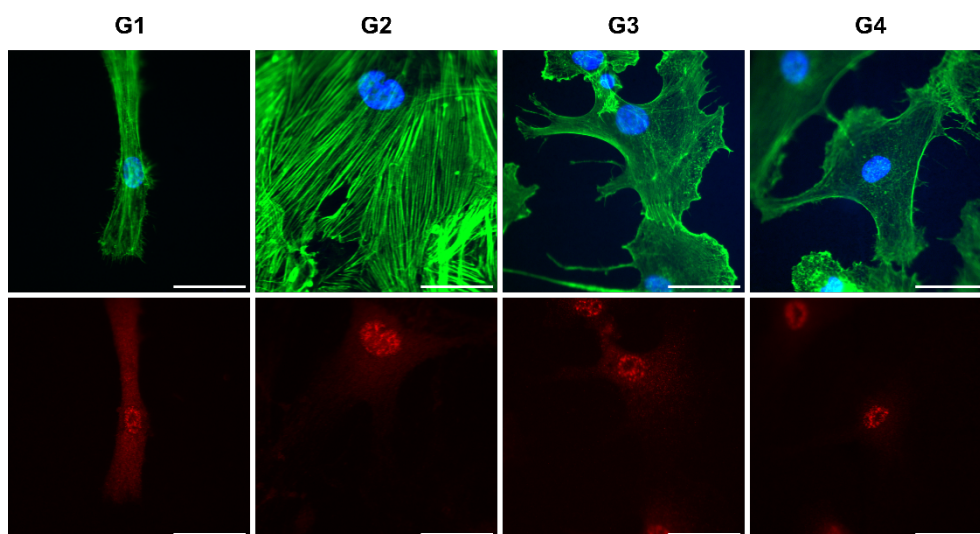

Figure S1: Representative fluorescence images of OPN staining of cells culture on different hydrogels (G1 to G4) functionalized with Mix1. Cytoskeleton (green) and nucleus (blue) on the top row and OPN (red) on the bottom row. Scale bar = 50  $\mu$ m.

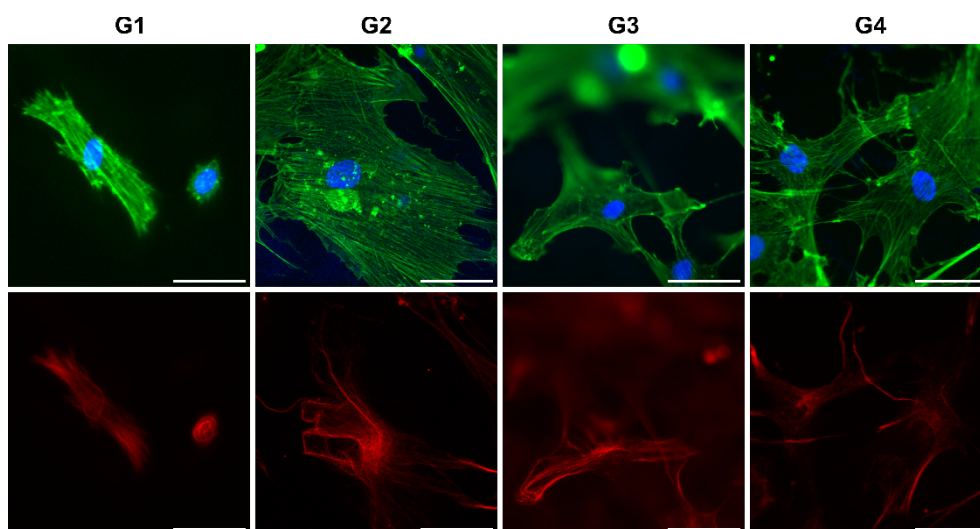

Figure S2: Representative fluorescence images of PDPN staining of cells culture on different hydrogels (G1 to G4) functionalized with Mix1. Cytoskeleton (green) and nucleus (blue) on the top row and E11 (red) on the bottom row. Scale bar = 50  $\mu$ m.

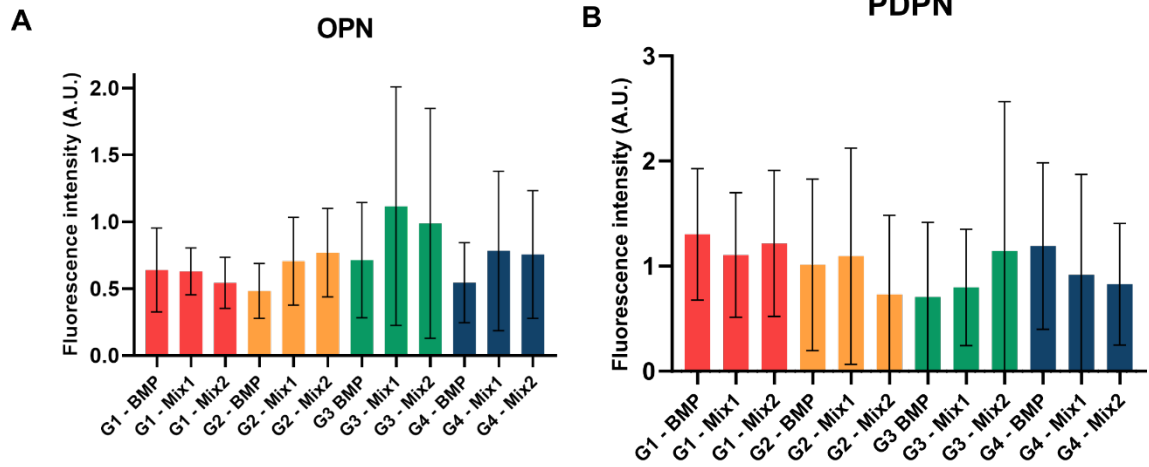

Figure S3: Evaluation of OPN and PDPN fluorescence intensity from immunocytochemistry assay.

|           | G1 - BMP | G1 - Mix1 | G1 - Mix2 | G2 - BMP | G2 - Mix1 | G2 - Mix2 | G3 BMP | G3 - Mix1 | G3 - Mix2 | G4 - BMP | G4 - Mix1 | G4 - Mix2 |
|-----------|----------|-----------|-----------|----------|-----------|-----------|--------|-----------|-----------|----------|-----------|-----------|
| G1 - BMP  |          | ns        | ns        | ns       | ****      | ****      | ns     | ****      | ***       | ns       | ****      | *         |
| G1 - Mix1 |          |           | ns        | ns       | ****      | ****      | ns     | ****      | ****      | ns       | ****      | **        |
| G1 - Mix2 |          |           |           | ns       | ****      | ****      | ns     | ****      | ****      | ns       | ****      | **        |
| G2 - BMP  |          |           |           |          | ****      | ****      | ns     | *         | ns        | ns       | ns        | ns        |
| G2 - Mix1 |          |           |           |          |           | ns        | ****   | ***       | ***       | ****     | ****      | ****      |
| G2 - Mix2 |          |           |           |          |           |           | ****   | ns        | ns        | ****     | ns        | ***       |
| G3 BMP    |          |           |           |          |           |           |        | *         | ns        | ns       | ns        | ns        |
| G3 - Mix1 |          |           |           |          |           |           |        |           | ns        | ****     | ns        | ns        |
| G3 - Mix2 |          |           |           |          |           |           |        |           |           | **       | ns        | ns        |
| G4 - BMP  |          |           |           |          |           |           |        |           |           |          | ***       | ns        |
| G4 - Mix1 |          |           |           |          |           |           |        |           |           |          |           | ns        |
| G4 - Mix2 |          |           |           |          |           |           |        |           |           |          |           |           |

Table S1: Statistical analyses of total cell area. Statistical analyses were done by one-way analysis of variance (ANOVA) and Tukey's test for multiple comparisons. P values are represented as follows \* < 0.05, \*\* < 0.01, \*\*\* < 0.001, \*\*\*\* < 0.0001. ns indicates the absence of statistical significance at alpha equal to 0.05.

|           | G1 - BMP | G1 - Mix1 | G1 - Mix2 | G2 - BMP | G2 - Mix1 | G2 - Mix2 | G3 BMP | G3 - Mix1 | G3 - Mix2 | G4 - BMP | G4 - Mix1 | G4 - Mix2 |
|-----------|----------|-----------|-----------|----------|-----------|-----------|--------|-----------|-----------|----------|-----------|-----------|
| G1 - BMP  |          | ns        | ns        | ns       | ****      | ****      | ns     | **        | ns        | ns       | ns        | ns        |
| G1 - Mix1 |          |           | ns        | **       | ****      | ****      | ns     | ***       | *         | *        | *         | *         |
| G1 - Mix2 |          |           |           | ***      | ****      | ****      | ns     | ****      | ***       | **       | ***       | ***       |
| G2 - BMP  |          |           |           |          | **        | *         | ns     | ns        | ns        | ns       | ns        | ns        |
| G2 - Mix1 |          |           |           |          |           | ns        | ****   | ns        | *         | ***      | **        | **        |
| G2 - Mix2 |          |           |           |          |           |           | ****   | ns        | ns        | **       | **        | **        |
| G3 BMP    |          |           |           |          |           |           |        | ns        | ns        | ns       | ns        | ns        |
| G3 - Mix1 |          |           |           |          |           |           |        |           | ns        | ns       | ns        | ns        |
| G3 - Mix2 |          |           |           |          |           |           |        |           |           | ns       | ns        | ns        |
| G4 - BMP  |          |           |           |          |           |           |        |           |           |          | ns        | ns        |
| G4 - Mix1 |          |           |           |          |           |           |        |           |           |          |           | ns        |
| G4 - Mix2 |          |           |           |          |           |           |        |           |           |          |           |           |

Table S2: Statistical analyses of nuclei area. Statistical analyses were done by one-way analysis of variance (ANOVA) and Tukey's test for multiple comparisons. P values are represented as follows \* < 0.05, \*\* < 0.01, \*\*\* < 0.001, \*\*\*\* < 0.0001. ns indicates the absence of statistical significance at alpha equal to 0.05.

|           | G1 - BMP | G1 - Mix1 | G1 - Mix2 | G2 - BMP | G2 - Mix1 | G2 - Mix2 | G3 BMP | G3 - Mix1 | G3 - Mix2 | G4 - BMP | G4 - Mix1 | G4 - Mix2 |
|-----------|----------|-----------|-----------|----------|-----------|-----------|--------|-----------|-----------|----------|-----------|-----------|
| G1 - BMP  |          | ns        | ns        | ns       | ns        | ns        | ns     | **        | ns        | ns       | ns        | ns        |
| G1 - Mix1 |          |           | ns        | ns       | ns        | ns        | ns     | **        | ns        | ns       | ns        | ns        |
| G1 - Mix2 |          |           |           | ns       | ns        | ns        | ns     | ****      | *         | ns       | ns        | ns        |
| G2 - BMP  |          |           |           |          | ns        | ns        | ns     | ****      | **        | ns       | ns        | ns        |
| G2 - Mix1 |          |           |           |          |           | ns        | ns     | *         | ns        | ns       | ns        | ns        |
| G2 - Mix2 |          |           |           |          |           |           | ns     | ns        | ns        | ns       | ns        | ns        |
| G3 BMP    |          |           |           |          |           |           |        | *         | ns        | ns       | ns        | ns        |
| G3 - Mix1 |          |           |           |          |           |           |        |           | ns        | ****     | ns        | ns        |
| G3 - Mix2 |          |           |           |          |           |           |        |           |           | *        | ns        | ns        |
| G4 - BMP  |          |           |           |          |           |           |        |           |           |          | ns        | ns        |
| G4 - Mix1 |          |           |           |          |           |           |        |           |           |          |           | ns        |
| G4 - Mix2 |          |           |           |          |           |           |        |           |           |          |           |           |

Table S3: Statistical analyses of OPN. Statistical analyses were done by one-way analysis of variance (ANOVA) and Tukey's test for multiple comparisons. P values are represented as follows \* < 0.05, \*\* < 0.01, \*\*\* < 0.001, \*\*\*\* < 0.0001. ns indicates the absence of statistical significance at alpha equal to 0.05.

|           | G1 - BMP | G1 - Mix1 | G1 - Mix2 | G2 - BMP | G2 - Mix1 | G2 - Mix2 | G3 BMP | G3 - Mix1 | G3 - Mix2 | G4 - BMP | G4 - Mix1 | G4 - Mix2 |
|-----------|----------|-----------|-----------|----------|-----------|-----------|--------|-----------|-----------|----------|-----------|-----------|
| G1 - BMP  |          | ns        | ns        | ns       | ns        | *         | *      | ns        | ns        | ns       | ns        | ns        |
| G1 - Mix1 |          |           | ns        | ns       | ns        | ns        | ns     | ns        | ns        | ns       | ns        | ns        |
| G1 - Mix2 |          |           |           | ns       | ns        | ns        | ns     | ns        | ns        | ns       | ns        | ns        |
| G2 - BMP  |          |           |           |          | ns        | ns        | ns     | ns        | ns        | ns       | ns        | ns        |
| G2 - Mix1 |          |           |           |          |           | ns        | ns     | ns        | ns        | ns       | ns        | ns        |
| G2 - Mix2 |          |           |           |          |           |           | ns     | ns        | ns        | ns       | ns        | ns        |
| G3 BMP    |          |           |           |          |           |           |        | ns        | ns        | ns       | ns        | ns        |
| G3 - Mix1 |          |           |           |          |           |           |        |           | ns        | ns       | ns        | ns        |
| G3 - Mix2 |          |           |           |          |           |           |        |           |           | ns       | ns        | ns        |
| G4 - BMP  |          |           |           |          |           |           |        |           |           |          | ns        | ns        |
| G4 - Mix1 |          |           |           |          |           |           |        |           |           |          |           | ns        |
| G4 - Mix2 |          |           |           |          |           |           |        |           |           |          |           |           |

Table S4: Statistical analyses of E11 intensity. Statistical analyses were done by one-way analysis of variance (ANOVA) and Tukey's test for multiple comparisons. P values are represented as follows \* < 0.05, \*\* < 0.01, \*\*\* < 0.001, \*\*\*\* < 0.0001. ns indicates the absence of statistical significance at alpha equal to 0.05.
